# Supplementary material
Source: PubMed Central journal article supplement (PMC6591704)
Supplement: cb9b00223_si_001.pdf [file cb9b00223_si_001.pdf]

## **Omics Technologies to Understand Activation of a Biosynthetic Gene Cluster in *Micromonospora* sp. WMMB235: Deciphering Keyicin Biosynthesis**

Deepa Acharya,<sup>a</sup> Ian Miller,<sup>a</sup> Yusi Cui,<sup>a</sup> Doug R. Braun,<sup>a</sup> Mark E. Berres,<sup>b</sup> Matthew J. Styles,<sup>c</sup> Lingjun Li,<sup>a</sup> Jason Kwan,<sup>a</sup> Scott R. Rajski,<sup>a</sup> Helen E. Blackwell,<sup>c</sup> and Tim S. Bugni<sup>a,\*</sup>

<sup>a</sup>Pharmaceutical Sciences Division, University of Wisconsin-Madison, Madison, Wisconsin 53705, USA

<sup>b</sup>Bioinformatics Resource Center, University of Wisconsin-Madison, Madison, Wisconsin 53706, USA

<sup>c</sup>Department of Chemistry, University of Wisconsin-Madison, Madison, Wisconsin 53706, USA

## Table of Contents

|                    |                                                                                                                                                                                                |            |
|--------------------|------------------------------------------------------------------------------------------------------------------------------------------------------------------------------------------------|------------|
| <b>Methods1.</b>   | Parameters for AntiSmash.....                                                                                                                                                                  | <b>S3</b>  |
| <b>Methods2.</b>   | Transcriptomics details .....                                                                                                                                                                  | <b>S3</b>  |
| <b>Table S1.</b>   | RNA concentrations yielded from RNAeasy Plus Mini Kit extractions.....                                                                                                                         | <b>S3</b>  |
| <b>Table S2.</b>   | DiLeu reporter tags used to label each sample in the multiplex.....                                                                                                                            | <b>S4</b>  |
| <b>Table S3.</b>   | Summary of <i>kyc orf</i> assignments based on NCBI database information.....                                                                                                                  | <b>S5</b>  |
| <b>Table S4.</b>   | WMMB235-embedded BGC2 genes downregulated upon co-culturing with <i>Rhodococcus</i> sp. WMMA185.....                                                                                           | <b>S6</b>  |
| <b>Table S5.</b>   | WMMB235-embedded BGC9 genes downregulated upon co-culturing with <i>Rhodococcus</i> sp. WMMA185.....                                                                                           | <b>S6</b>  |
| <b>Figure S1.</b>  | Coculture interactions and subsequent activation of <i>kyc</i> .....                                                                                                                           | <b>S7</b>  |
| <b>Figure S2.</b>  | Sample quality control report of the RNA-Seq reads.....                                                                                                                                        | <b>S8</b>  |
| <b>Figure S3.</b>  | Schematic for labeled proteomics using DiLeu tagging.....                                                                                                                                      | <b>S9</b>  |
| <b>Figure S4.</b>  | Structural analysis of keyicin-like compounds.....                                                                                                                                             | <b>S10</b> |
| <b>Figure S5.</b>  | Keyicin and two of its analogs with temporal changes in intensity over time.....                                                                                                               | <b>S11</b> |
| <b>Figure S6.</b>  | UPLC-MS extracted ion chromatogram (EIC) for <i>m/z</i> at 805.35 +/- 0.05, representative of keyicin. ....                                                                                    | <b>S11</b> |
| <b>Figure S7.</b>  | Comparisons of absorbance at 470 nm for WMMB235 containing reactions.....                                                                                                                      | <b>S12</b> |
| <b>Figure S8.</b>  | Extracted UV chromatogram at 470nm of the coculture over time.....                                                                                                                             | <b>S12</b> |
| <b>Figure S9.</b>  | LCMS chromatogram for AHL (odDHL) treated WMMB235.....                                                                                                                                         | <b>S13</b> |
| <b>Figure S10.</b> | Principal component analysis (PCA) of LCMS data of monoculture WMMB235, WMMA185 and their co-culture extracts from samples that were subsequently used to isolate RNA for transcriptomics..... | <b>S13</b> |

**Parameters for AntiSmash:** The fasta nucleotide sequence was uploaded on AntiSmash v3.0 with ClusterFinder on, “Use ClusterFinder algorithm for BGC border prediction” on, Minimum cluster size in CDS 5, Minimum number of biosynthetic-related PFAM domains 5, Minimum ClusterFinder probability at 60% and using the “All on” for extra features which uses the following programs: KnownClusterBlast, ClusterBlast, SubClusterBlast, smCoG analysis, Active Site Finder, Detect TTA codons, Whole genome PFAM analysis.

**Transcriptomics details:**

Read filtering done by removing low abundance genes defined as those with an average read count below a threshold of 1.0 in two or more samples. Samples in RNASeq experiment were normalized by the method of trimmed mean of M-values (TMM), resulting in more uniform distributions centered on a common median.

**Table S1:** The total RNA concentrations yielded after the RNAeasy Plus Mini Kit extraction were all between 300-500 ng/ml concentration and had  $A_{260}/A_{280}$  values  $\sim 2$  suggesting good quality RNA. The values of the secondary measure of RNA purity  $A_{260}/A_{230}$  are also around the expected  $\sim 1.8$ .

| Entry | Sample name | $A_{260}(10mM)$ | $A_{260/280}$ | $A_{260/230}$ | Concentration(ng/ml) |
|-------|-------------|-----------------|---------------|---------------|----------------------|
| 1     | 185D21      | 12.851          | 2.09          | 2.13          | 514                  |
| 2     | 185D21      | 9.636           | 2.05          | 1.98          | 385                  |
| 3     | 185D23      | 5.839           | 2.08          | 1.95          | 233                  |
| 4     | 235D21      | 9.833           | 2.03          | 2.22          | 393                  |
| 5     | 235D22      | 6.3             | 2.07          | 1.82          | 252                  |
| 6     | 235D23      | 12.14           | 2.05          | 2.02          | 485                  |
| 7     | CoD21       | 10.005          | 2.02          | 2.2           | 400                  |
| 8     | CoD22       | 12.039          | 2.04          | 2.09          | 481                  |
| 9     | CoD23       | 11.127          | 1.97          | 2.2           | 445                  |
| 10    | 185D51      | 8.344           | 2.06          | 2.11          | 333                  |
| 11    | 185D52      | 10.453          | 1.94          | 1.98          | 418                  |
| 12    | 185D53      | 11.641          | 2.03          | 1.99          | 465                  |
| 13    | 235D51      | 12.334          | 2.05          | 2.2           | 493                  |
| 14    | 235D52      | 10.832          | 2             | 2.15          | 433                  |
| 15    | 235D53      | 12.221          | 1.99          | 2.05          | 489                  |
| 16    | CoD51       | 12.187          | 2.05          | 2.05          | 487                  |
| 17    | CoD52       | 12.631          | 2.04          | 2.13          | 505                  |
| 18    | CoD53       | 11.802          | 1.98          | 2.04          | 472                  |

**Table S2:** DiLeu reporter tags used to label each sample in the multiplex for Day 5 and Day 8 protein samples before analysis on LC-MS/MS for quantitative proteomics.

| <b>DiLeu Tag</b> | <b>Day 5 or Day 8 Sample</b>      | <b>Reporter ion</b> |
|------------------|-----------------------------------|---------------------|
| 115a             | WMMB235 Mono rep1                 | 115.12476m/z        |
| 116a             | WMMB235 with WMMA185 extract rep1 | 116.12812m/z        |
| 117a             | WMMB235 Mono rep2                 | 117.13147m/z        |
| 118a             | WMMB235 with WMMA185 extract rep2 | 118.13483m/z        |
| 117c             | WMMB235 Mono rep3                 | 117.14363m/z        |
| 118c             | WMMB235 with WMMA185 extract rep3 | 118.14699m/z        |

**Table S3:** Comprehensive summary of putative functions for all *kyc orfs* based on NCBI database. *kyc orf* products identified by proteomics indicated with green shading; repressive regulatory *orfs* identified in transcriptomics highlighted with yellow.

| ID          | NCBI_Prot_Accession | <i>kyc orf</i> | Protein ID          | putative function based on NCBI database                    |
|-------------|---------------------|----------------|---------------------|-------------------------------------------------------------|
| BFV98_00170 | OHX01510.1          | <b>kyc4</b>    | WMMB235_BFV98_00170 | deaminase                                                   |
| BFV98_00175 | 0                   | kyc5           | WMMB235_BFV98_00175 | DNA-binding response regulator                              |
| BFV98_00180 | OHX01511.1          | kyc6           | WMMB235_BFV98_00180 | methionine adenosyltransferase                              |
| BFV98_00185 | OHX07111.1          | <b>kyc7</b>    | WMMB235_BFV98_00185 | dTDP-glucose 4,6-dehydratase                                |
| BFV98_00190 | OHX01512.1          | kyc8           | WMMB235_BFV98_00190 | glucose-1-phosphate thymidyltransferase                     |
| BFV98_00195 | OHX01513.1          | kyc9           | WMMB235_BFV98_00195 | cyclase                                                     |
| BFV98_00200 | OHX07112.1          | kyc10          | WMMB235_BFV98_00200 | hydroxylacyl-CoA dehydrogenase                              |
| BFV98_00205 | OHX01514.1          | kyc11          | WMMB235_BFV98_00205 | short-chain dehydrogenase                                   |
| BFV98_00210 | OHX01515.1          | <b>kyc12</b>   | WMMB235_BFV98_00210 | glycosyl transferase family 28                              |
| BFV98_00215 | OHX01516.1          | kyc13          | WMMB235_BFV98_00215 | beta-ACP synthase                                           |
| BFV98_00220 | OHX01517.1          | <b>kyc14</b>   | WMMB235_BFV98_00220 | beta-ketoacyl synthase                                      |
| BFV98_00225 | OHX01518.1          | kyc15          | WMMB235_BFV98_00225 | actinorhodin polyketide synthase                            |
| BFV98_00230 | OHX01519.1          | <b>kyc16</b>   | WMMB235_BFV98_00230 | epimerase                                                   |
| BFV98_00235 | OHX01520.1          | kyc17          | WMMB235_BFV98_00235 | phytanoyl-CoA dioxygenase                                   |
| BFV98_00240 | OHX01521.1          | kyc18          | WMMB235_BFV98_00240 | diguanylate cyclase                                         |
| BFV98_00245 | OHX01522.1          | kyc19          | WMMB235_BFV98_00245 | SAM-dependent methyltransferase                             |
| BFV98_00250 | OHX01523.1          | <b>kyc20</b>   | WMMB235_BFV98_00250 | glycosyl transferase family 28                              |
| BFV98_00255 | OHX01524.1          | kyc21          | WMMB235_BFV98_00255 | cyclase                                                     |
| BFV98_00260 | OHX01525.1          | kyc22          | WMMB235_BFV98_00260 | ketoacyl reductase                                          |
| BFV98_00265 | OHX07113.1          | kyc24          | WMMB235_BFV98_00265 | glycosyl transferase family 28                              |
| BFV98_00270 | OHX01526.1          | <b>kyc25</b>   | WMMB235_BFV98_00270 | glycosyl transferase family 28                              |
| BFV98_00275 | OHX01527.1          | <b>kyc26</b>   | WMMB235_BFV98_00275 | cytochrome                                                  |
| BFV98_00280 | OHX01528.1          | kyc27          | WMMB235_BFV98_00280 | NAD-dependent epimerase                                     |
| BFV98_00285 | OHX01529.1          | <b>kyc28</b>   | WMMB235_BFV98_00285 | dTDP-4-dehydrorhamnose 3,5-epimerase                        |
| BFV98_00290 | OHX01530.1          | kyc29          | WMMB235_BFV98_00290 | glycosyl transferase family 28                              |
| BFV98_00295 | OHX01531.1          | kyc30          | WMMB235_BFV98_00295 | TetR family transcriptional regulator                       |
| BFV98_00300 | OHX01532.1          | kyc31          | WMMB235_BFV98_00300 | NmrA family transcriptional regulator                       |
| BFV98_00305 | OHX01533.1          | <b>kyc32</b>   | WMMB235_BFV98_00305 | glycosyl transferase family 28                              |
| BFV98_00310 | OHX01534.1          | kyc33          | WMMB235_BFV98_00310 | ketoreductase                                               |
| BFV98_00315 | OHX01535.1          | <b>kyc34</b>   | WMMB235_BFV98_00315 | ester cyclase                                               |
| BFV98_00320 | OHX07114.1          | kyc35          | WMMB235_BFV98_00320 | methyltransferase                                           |
| BFV98_00325 | OHX01536.1          | kyc36          | WMMB235_BFV98_00325 | NmrA family transcriptional regulator                       |
| BFV98_00330 | OHX01537.1          | kyc37          | WMMB235_BFV98_00330 | FAD-linked oxidase                                          |
| BFV98_00335 | OHX01538.1          | kyc38          | WMMB235_BFV98_00335 | antibiotic biosynthesis monooxygenase                       |
| BFV98_00340 | OHX01539.1          | kyc39          | WMMB235_BFV98_00340 | multidrug ABC transporter permease                          |
| BFV98_00345 | OHX01540.1          | kyc40          | WMMB235_BFV98_00345 | ABC transporter                                             |
| BFV98_00350 | OHX07115.1          | kyc41          | WMMB235_BFV98_00350 | DNA-binding response regulator                              |
| BFV98_00355 | OHX01541.1          | kyc42          | WMMB235_BFV98_00355 | transcriptional regulator                                   |
| BFV98_00360 | OHX01542.1          | kyc43          | WMMB235_BFV98_00360 | oxidoreductase                                              |
| BFV98_00365 | OHX01543.1          | kyc44          | WMMB235_BFV98_00365 | SAM-dependent methyltransferase                             |
| BFV98_00370 | OHX01544.1          | <b>kyc45</b>   | WMMB235_BFV98_00370 | daunorubicin biosynthesis sensory transduction protein DnrJ |
| BFV98_00375 | OHX01545.1          | kyc46          | WMMB235_BFV98_00375 | NDP-hexose 2,3-dehydratase                                  |
| BFV98_00380 | OHX01546.1          | kyc48          | WMMB235_BFV98_00380 | hypothetical protein                                        |
| BFV98_00385 | OHX01547.1          | kyc49          | WMMB235_BFV98_00385 | NADPH-dependent FMN reductase                               |
| BFV98_00390 | OHX01548.1          | kyc50          | WMMB235_BFV98_00390 | SAM-dependent methyltransferase                             |
| BFV98_00395 | OHX01549.1          | kyc51          | WMMB235_BFV98_00395 | DUF4440 domain-containing protein                           |
| BFV98_00400 | OHX01550.1          | kyc52          | WMMB235_BFV98_00400 | hypothetical protein                                        |
| BFV98_00405 | OHX01551.1          | kyc53          | WMMB235_BFV98_00405 | acyl-CoA dehydrogenase                                      |
| BFV98_00410 | OHX01552.1          | kyc54          | WMMB235_BFV98_00410 | transcriptional regulator                                   |

**Table S4:** WMMB235-embedded BGC2 genes downregulated upon coculturing with *Rhodococcus* sp. WMMA185.

| ID          | NCBI accession number | Log <sub>2</sub> FC Day 5 (Co/Mono) | NCBI Annotation (putative function of the gene product) | Homologue  | MiBIG cluster |
|-------------|-----------------------|-------------------------------------|---------------------------------------------------------|------------|---------------|
| BFV98_00820 | OHX01627.1            | -1.48600927                         | hypothetical protein                                    | AAN85518.1 | BGC0001101    |
| BFV98_00815 | OHX01626.1            | -1.41694817                         | enoyl-CoA hydratase                                     | AAN85519.1 | BGC0001101    |
| BFV98_00940 | OHX01649.1            | -1.24897815                         | ABC transporter                                         | AAN85531.1 | BGC0001101    |
| BFV98_00860 | OHX01634.1            | -1.20094237                         | ABC transporter                                         | AAP85349.1 | BGC0000233    |
| BFV98_00865 | OHX01635.1            | -1.18908439                         | ABC transporter                                         | AAG32068.1 | BGC0000026    |
| BFV98_00925 | OHX01646.1            | -1.1046561                          | ABC transporter substrate-binding protein               | AAN85534.1 | BGC0001101    |
| BFV98_00915 | OHX01644.1            | -1.07446882                         | polyketide $\beta$ -ketoacyl:ACP synthase               | ADI59526.1 | BGC0001091    |
| BFV98_00910 | OHX01643.1            | -1.07396388                         | phosphopantetheine-binding protein                      | AAW33973.1 | BGC0000255    |

**Table S5:** WMMB235-embedded BGC9 genes downregulated upon coculturing with *Rhodococcus* sp. WMMA185.

| ID          | NCBI accession number | Log <sub>2</sub> FC Day 5 (Co/Mono) | NCBI Annotation (putative function of the gene product)       | Homologue  | MiBIG Cluster |
|-------------|-----------------------|-------------------------------------|---------------------------------------------------------------|------------|---------------|
| BFV98_26800 | OHX06338.1            | -2.14562736                         | acyl carrier protein (ACP)                                    | AHA12082.1 | BGC0001172    |
| BFV98_26795 | OHX06337.1            | -1.92477769                         | $\beta$ -ketoacyl-ACP synthase II                             | CUI25675.1 | BGC0001353    |
| BFV98_26855 | OHX06349.1            | -1.89956036                         | pyruvate dehydrogenase (acetyl-transferring)-homodimeric type | A0R0B0.1   | -             |
| BFV98_26790 | OHX06336.1            | -1.70957738                         | hypothetical protein                                          | A3Q339.1   | -             |
| BFV98_26830 | OHX06344.1            | -1.44829961                         | copper resistance protein CopC                                | Q56797.1   | -             |
| BFV98_26805 | OHX06339.1            | -1.27058731                         | 3-oxoacyl-ACP synthase                                        | CBW54661.1 | BGC0000971    |
| BFV98_26835 | OHX06345.1            | -1.24636114                         | tRNA-synthetase class I                                       | CAG14955.2 | BGC0000253    |
| BFV98_26810 | OHX06340.1            | -1.10536628                         | biotin attachment protein                                     | AJO72737.1 | BGC0001381    |
| BFV98_26775 | OHX06333.1            | -1.07607101                         | hypothetical protein                                          | -          | -             |

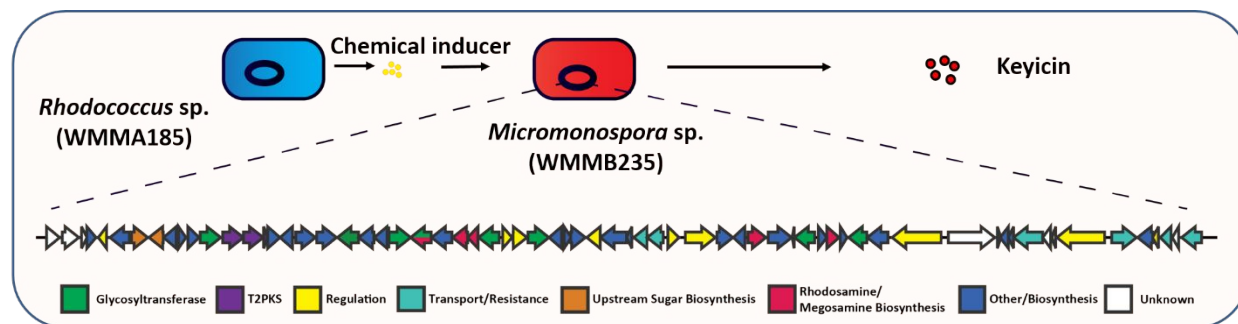

**Figure S1.** Schematic of coculture interactions and subsequent activation of silent BGC *key* cluster, by a *Rhodococcus*-derived small molecule.

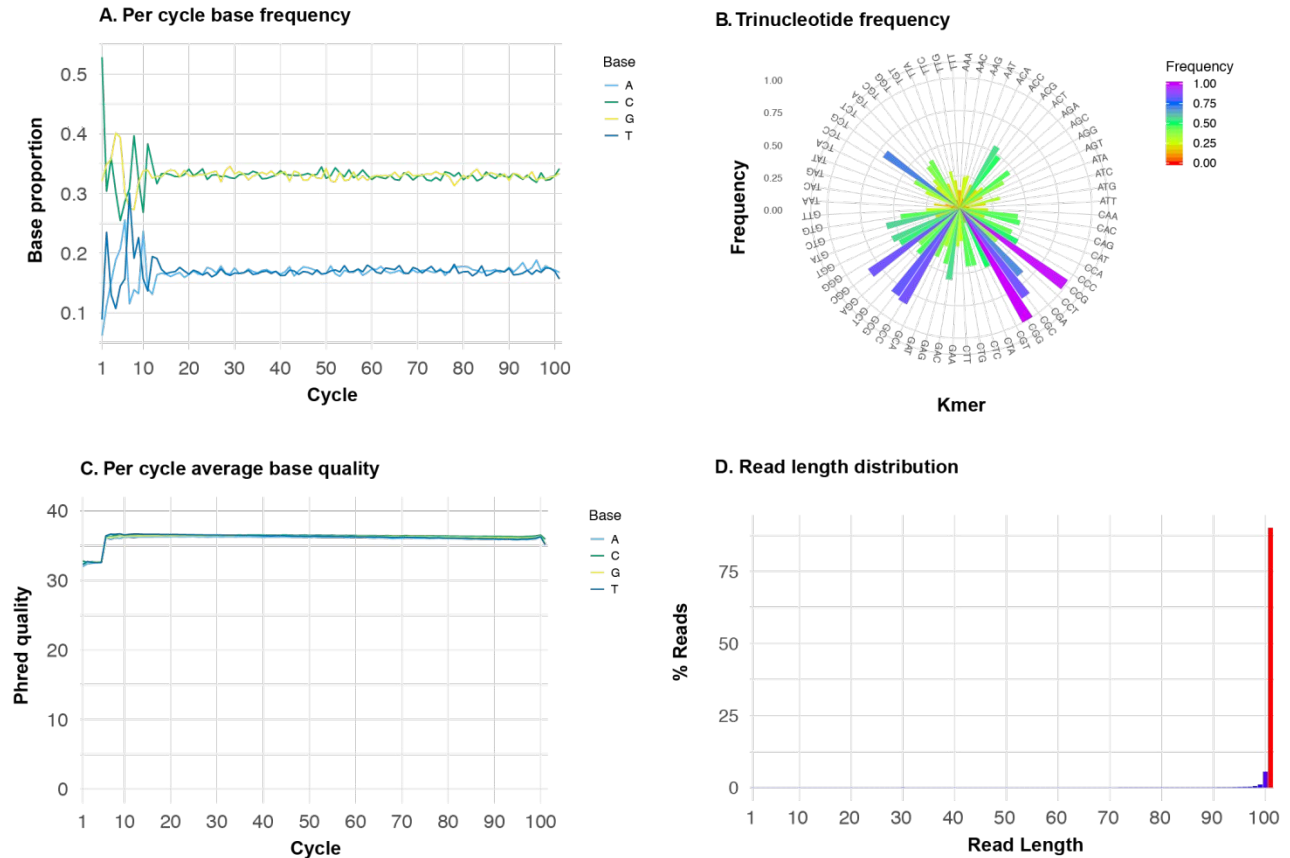

**Figure S2.** Sample quality control report of the RNA-Seq reads for sample – coculture day 2, Replicate 2. Similar results were obtained for all the nine samples, and suggested high quality reads. **A)** Per cycle base frequency. The frequency of each nucleotide base position across the length of the read shows the absence of any sequence bias. The effect on the base composition in the early sequences (cycles 1–10) is known and does not affect the base content of the read. **B)** Trinucleotide frequency. The relative frequency of trinucleotides (3-mer) shows relatively uniform representation. If one or more 3-mers dominate the remaining 3-mers, it may indicate the presence of a contaminating sequence, which is not the case here. **C)** Per cycle average base quality. The Phred scaled quality scores are > 30 which is equivalent to 99.9% base call accuracy. **D)** Read length distribution. Expected value of 100 bp (target read length) observed for majority of reads during RNASeq experiment.



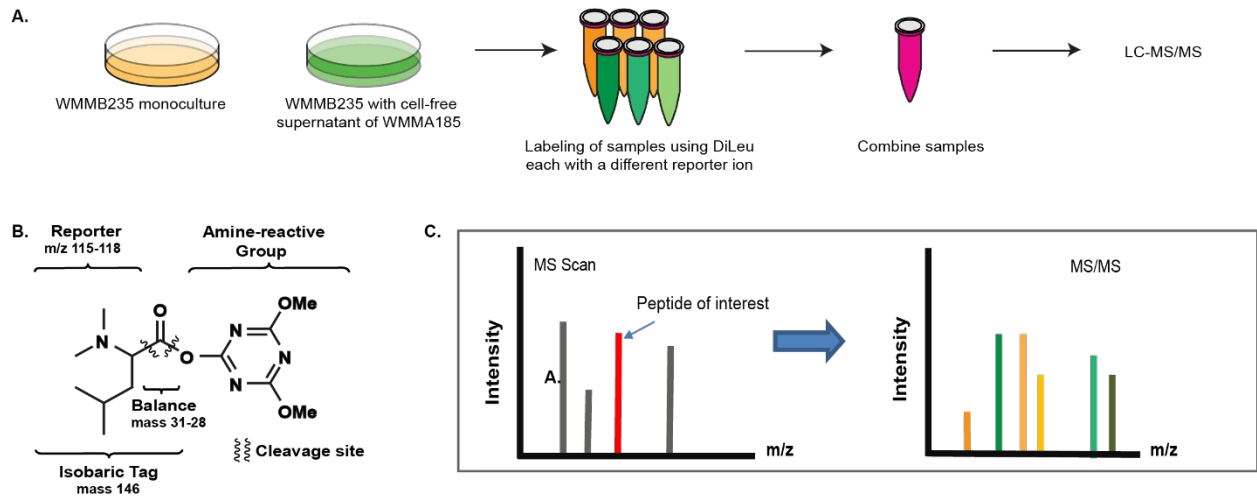

**Figure S3.** Schematic for labeled proteomics using DiLeu. **A)** Triplicates of WMMB235 monoculture and WMMB235 cultured in the supernatant of WMMA185 were labeled individually and combined according day of sampling (day 5 or day 8). **B)** DiLeu reporter showing the range in reporter ion mass and the amine reactive group, allowing the same mass of the modified peptide in MS1 scan but different MS2 ions after fragmentation at the cleavage site. **C)** Schematic showing a common peptide of interest in the MS1 scan fragmenting to 6 different reporter ions, each from a different sample on a particular day. This allows for quantification in the peptide present in each sample.

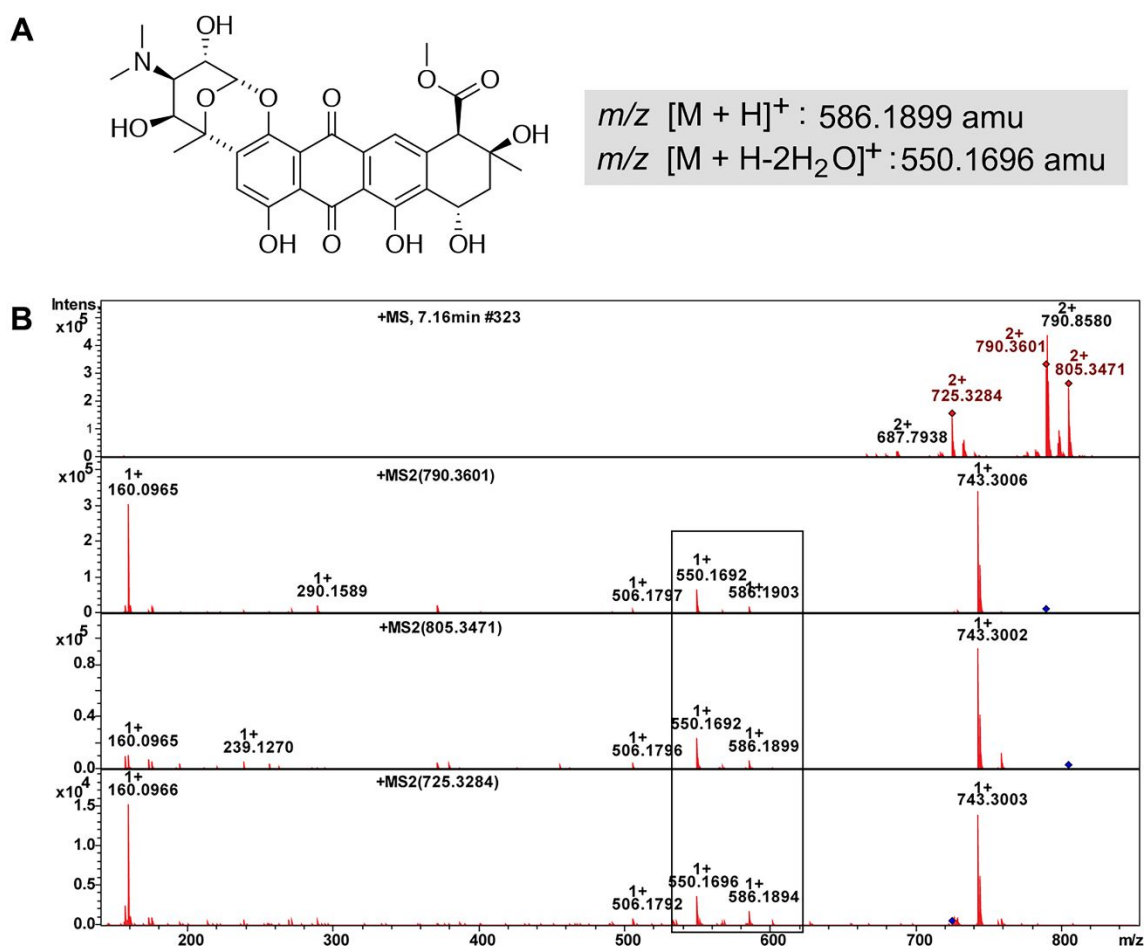

**Figure S4.** Structural analysis of keyicin-like compounds. **A)** Aglycone core of keyicin. **B)** Analogs of keyicin all share the anthracycline core as reflected by  $m/z$  signals at 550.1696, as well as  $m/z = 790.3601$ , 805.3471 (keyicin) and 725.3284 amu.

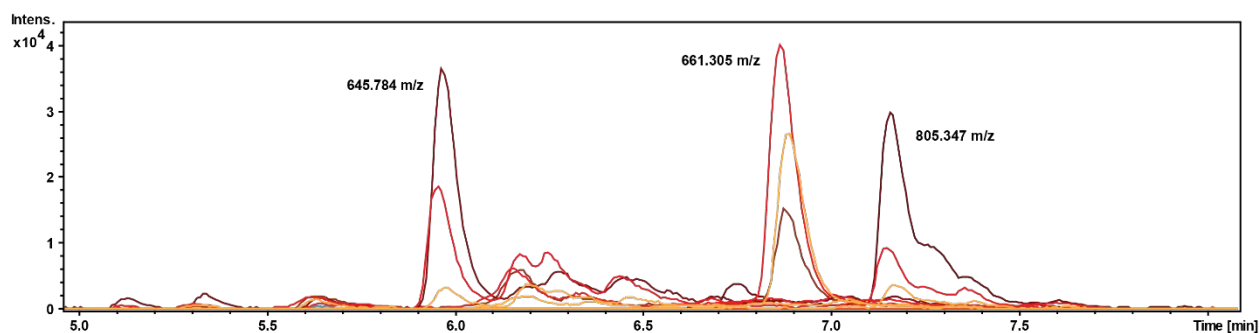

**Figure S5.** Keyicin and two of its analogs with temporal changes in intensity over time. Yellow: day 2, orange: day 5, Red: day 8 and Maroon: day 14. Keyicin ( $m/z = 805.347$ ) increases in intensity over time;  $m/z = 645.784$  follows a similar pattern, suggesting it is an analog;  $m/z = 661.305$  first increases in intensity, but then is reduced by day 14, suggesting its intermediacy *en route* to keyicin or related analogs.

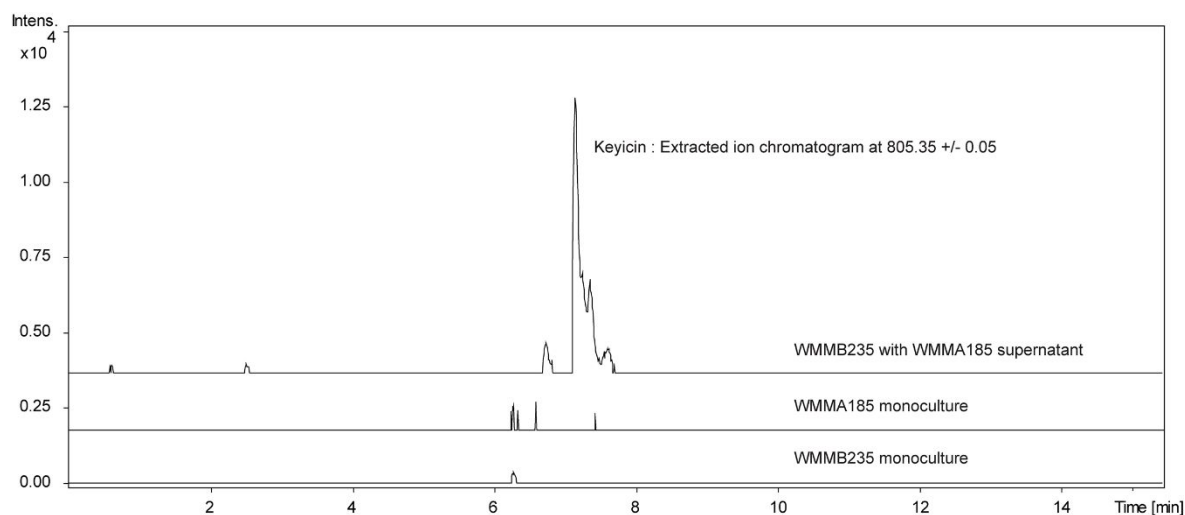

**Figure S6.** UPLC-MS extracted ion chromatogram (EIC) for  $m/z$  at  $805.35 \pm 0.05$ , representative of keyicin. The EIC of monocultures, WMMA185 and WMMB235 show the absence of keyicin, whereas WMMB235 in the presence of WMMA185 supernatant shows keyicin production, indicating that the coculture interaction can be recapitulated by small molecule induction from WMMA185.

**Figure S7.** Comparisons of absorbance at 470 nm for WMMB235 monoculture versus WMMB235 + WMMA185 supernatant versus WMMB235 + WMMA185 coculture. Notably, absorbance at 470 nm is recorded in WMMB235 monoculture likely due to media components and cellular contents; however, this absorbance constitutes a baseline value used to generate fold-change (FC) values used to generate Figure 2 and other graphics in the manuscript. N=3, statistical significance was estimated for supernatant treated monoculture and the coculture by comparison with the monoculture absorbance; \* indicates  $p < 0.05$

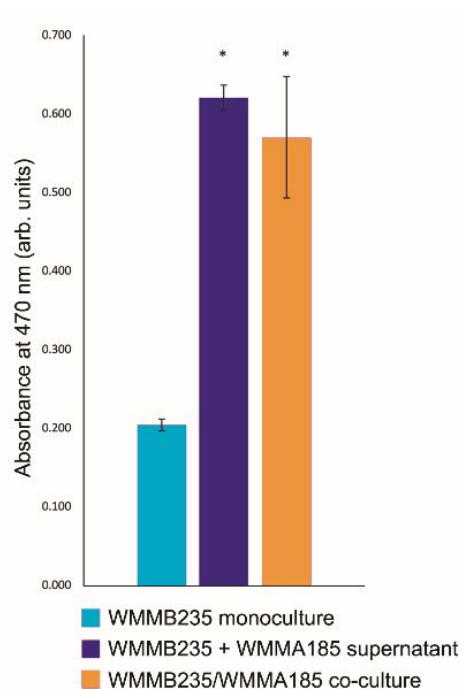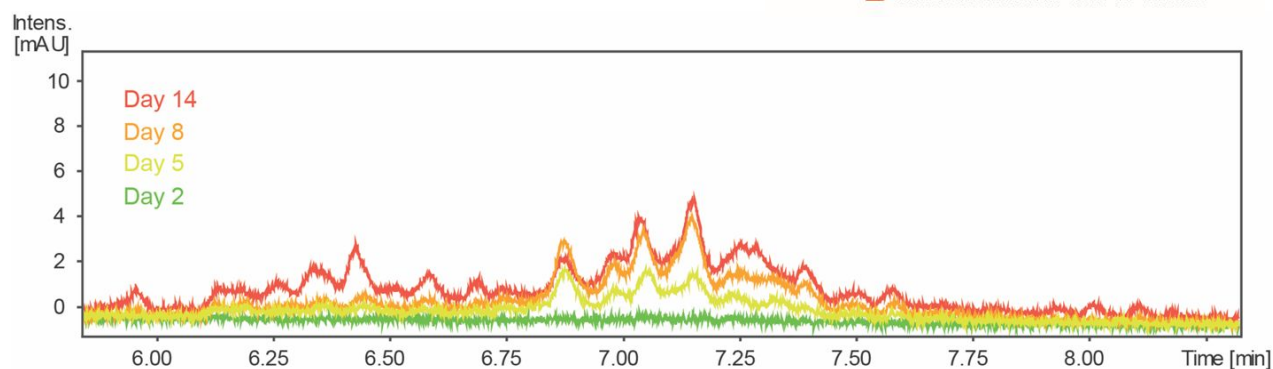

**Figure S8.** Extracted UV chromatogram at 470nm of the co-culture over time. Peaks corresponding to keyicin and its analogs can be visualized using LCMS-PDA, which shows these compounds increasing in intensity from day 2 to day 14. Each of these peaks were analyzed using MS/MS and confirmed to be analogs of keyicin from the fragmentation pattern, examples of which are shown in Figure S4.

**Figure S9.** LCMS chromatogram for AHL (odDHL) treated WMMB235. **A)** EIC for  $m/z$  805.34 +/- 0.05 shows the LC peak corresponding to keyicin. **B)** The mass spectrum of the keyicin peak shows the doubly charged MS peak for keyicin, showing that odDHL can trigger keyicin production by WMMB235, albeit at lower intensity.

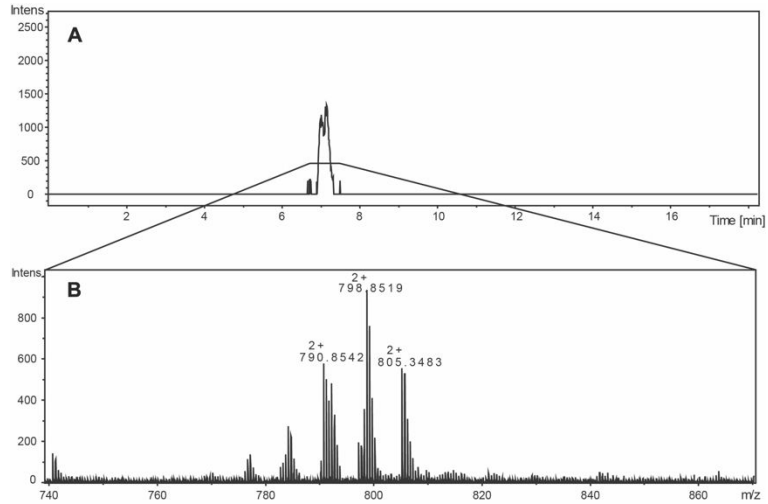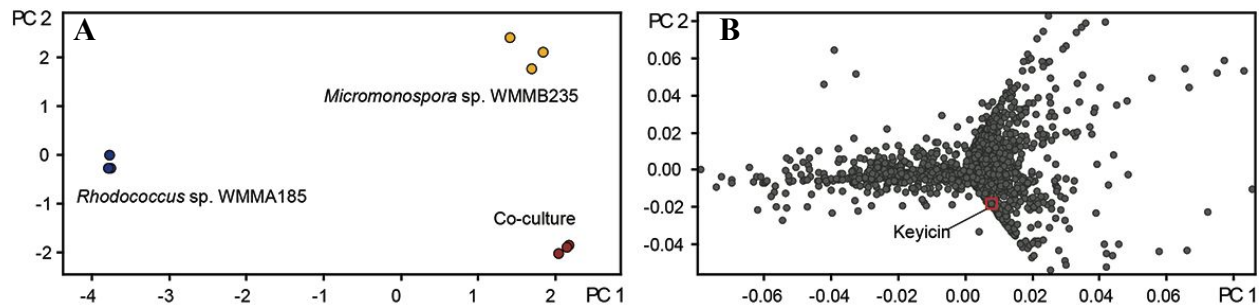

**Figure S10.** Principal component analysis (PCA) of LCMS data of monoculture WMMB235, WMMA185 and their coculture extracts from samples that were subsequently used to isolate RNA for transcriptomics. **A)** Scores plot showing the clustering of the replicates of monocultures and cocultures and spatial separation between groups which indicates significant differences in the metabolites produced in coculture. **B)** Loadings plot showing  $m/z$  ions representative of compounds produced in each condition. Keyicin ion is only found in the co-culture.
